# Supplementary material
Source: publisher figshare collection journal article supplement (https://acs.figshare.com/ndownloader/files/23440973)
Supplement: Supplementary file 1 [file 23440973]

# Supporting Information

## Anisotropic Triangular Lattice Realized in Rhenium Oxychlorides $A_3\text{ReO}_5\text{Cl}_2$ ( $A = \text{Ba}$ and $\text{Sr}$ )

*Daigorou Hirai<sup>†\*</sup>, Takeshi Yajima<sup>‡</sup>, Kazuhiro Nawa<sup>‡</sup>, Mitsuaki Kawamura<sup>‡</sup>,  
and Zenji Hiroi<sup>†\*</sup>*

<sup>†</sup>Institute for Solid State Physics, University of Tokyo, Kashiwa, Chiba  
277-8581, Japan

<sup>‡</sup>Institute of Multidisciplinary Research for Advanced Materials, Tohoku  
University, 2-1-1 Katahira, Sendai 980-8577, Japan

### Corresponding Authors

\*[dhirai@issp.u-tokyo.ac.jp](mailto:dhirai@issp.u-tokyo.ac.jp)

\*[hiro@issp.u-tokyo.ac.jp](mailto:hiro@issp.u-tokyo.ac.jp)

### Contents

Figure S1. Crystal structure of  $\text{Sr}_3\text{ReO}_5\text{Cl}$  and anisotropic displacement parameters for  $\text{Ba}_3\text{ReO}_5\text{Cl}_2$ .

Table S1. Crystal data and structure refinement for  $\text{Ba}_3\text{ReO}_5\text{Cl}_2$  and  $\text{Sr}_3\text{ReO}_5\text{Cl}_2$ .

Table S2. Structural parameters for  $\text{Ba}_3\text{ReO}_5\text{Cl}_2$  and  $\text{Sr}_3\text{ReO}_5\text{Cl}_2$ .

Table S3. Anisotropic displacement parameters  $U_{ij}$  ( $\text{\AA}^2$ ) for  $\text{Ba}_3\text{ReO}_5\text{Cl}_2$  and  $\text{Sr}_3\text{ReO}_5\text{Cl}_2$ .

Figure S2. The effect of SOIs on the band structure.

There is a subtle difference between the crystal structures of BROc and SROc originated from the size of A-site cations. The anisotropic displacement parameters (ADPs,  $U_{ij}$ ) for Cl sites refined based on the structure of  $\text{Ba}_3\text{WO}_5\text{Cl}_2$  converged to reasonable values of 0.01–0.077  $\text{\AA}^2$  for BROc (Table S3), while, for SROc, they became anomalously large:  $U_{33}(\text{Cl1}) = 0.33(3) \text{ \AA}^2$ ,  $U_{11}(\text{Cl2}) = 0.54(5) \text{ \AA}^2$ , which implies a tendency for the Cl1 and Cl2 sites to split along the  $c$  and  $a$  directions, respectively. A more reasonable fitting for SROc was obtained by assuming Cl site splittings: the Cl1 site at  $4c$  was split into two  $8f$  sites with half occupancy along the  $c$  direction, and the Cl2 site at  $4b$  was split into two  $8e$  sites with half occupancy along the  $a$  direction (Fig. S1 and Table S2). As a result, the reliability of refinement was improved from  $R_{wp} = 4.66\%$  to 2.48%. The structure is stable for large Ba ions but not so for small Sr ions, which may be compensated by the site splittings of Cl sites.

Although the ADPs for BROc and SROc become reasonably small by taking into account the splittings of the Cl, some of them are non-spherical, implying that there is a further structural instability in this structure. The ADPs of O2, Cl1 and Cl2 are stretched perpendicular to the  $b$ ,  $a$ , and  $c$  axes, respectively, probably because the bond between Sr/Ba2 and these sites are weak and unstable. It is speculated that the size mismatch between Cl layers and  $\text{A}_3\text{ReO}_5$  layers are responsible for this structural instability inducing the anisotropic and large ADPs.

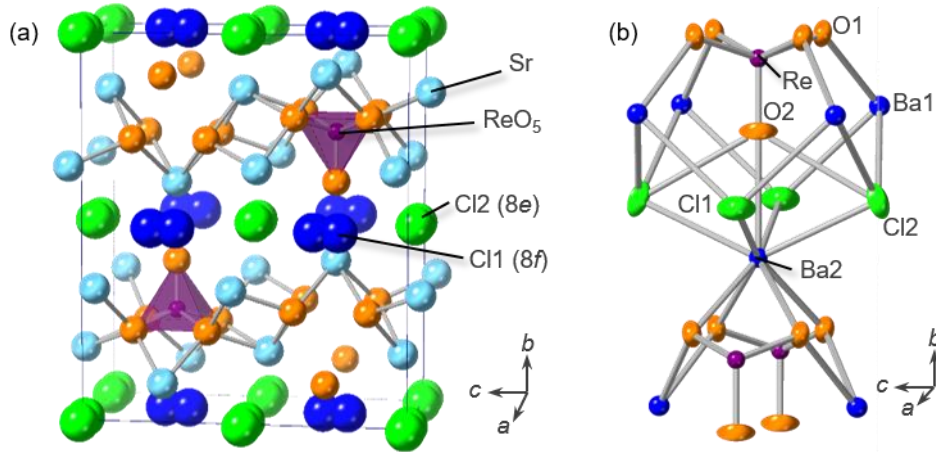

Figure S1. (a) Crystal structure of  $\text{Sr}_3\text{ReO}_5\text{Cl}$  showing the site splitting of Cl1 and Cl2 at the  $8f$  and  $8e$  sites along the  $c$  and  $a$  axes, respectively. (b) The anisotropic displacement parameters (ADPs) for BROc are shown by the ellipsoids. The ADPs of O2, Cl1, and Cl2 are stretched perpendicular to the bonds between Ba2 and these sites.

Table S1. Crystal data and structure refinement for Ba<sub>3</sub>ReO<sub>5</sub>Cl<sub>2</sub> and Sr<sub>3</sub>ReO<sub>5</sub>Cl<sub>2</sub>.

|                                            |                                                                     |                                                                     |
|--------------------------------------------|---------------------------------------------------------------------|---------------------------------------------------------------------|
| Empirical formula                          | Ba <sub>3</sub> ReO <sub>5</sub> Cl <sub>2</sub>                    | Sr <sub>3</sub> ReO <sub>5</sub> Cl <sub>2</sub>                    |
| Formula weight (g mol <sup>-1</sup> )      | 749.12                                                              | 599.96                                                              |
| Temperature (K)                            | 296(2)                                                              | 296(2)                                                              |
| Wavelength                                 | MoK $\alpha$ ( $\lambda$ = 0.71075 Å)                               | MoK $\alpha$ ( $\lambda$ = 0.71075 Å)                               |
| Absorption coefficient (mm <sup>-1</sup> ) | 26.196                                                              | 34.401                                                              |
| <i>F</i> (000)                             | 1269                                                                | 1052                                                                |
| $\theta$ range for data collection (deg)   | 3.42 to 27.45                                                       | 3.09 to 27.49                                                       |
| Index ranges                               | $-7 \leq h \leq 7$ , $-18 \leq k \leq 18$ ,<br>$-14 \leq l \leq 14$ | $-7 \leq h \leq 7$ , $-16 \leq k \leq 16$ ,<br>$-14 \leq l \leq 14$ |
| Reflections collected                      | 4407                                                                | 3978                                                                |

Table S2. Structural parameters for Ba<sub>3</sub>ReO<sub>5</sub>Cl<sub>2</sub> and Sr<sub>3</sub>ReO<sub>5</sub>Cl<sub>2</sub>.

| Atom                                                                                                                                                                                                                                                                               | Wyckoff positions | Symmetry            | <i>x</i>  | <i>y</i>   | <i>z</i>   | occupancy | 100 <i>U</i> <sub>eq</sub> (Å <sup>2</sup> ) |
|------------------------------------------------------------------------------------------------------------------------------------------------------------------------------------------------------------------------------------------------------------------------------------|-------------------|---------------------|-----------|------------|------------|-----------|----------------------------------------------|
| Ba <sub>3</sub> ReO <sub>5</sub> Cl <sub>2</sub> , space group <i>Cmcm</i> (No. 63), <i>a</i> = 5.79424(18) Å, <i>b</i> = 13.9508(4) Å, <i>c</i> = 11.4414(5) Å, <i>Z</i> = 4, <i>V</i> = 924.86(5) Å <sup>3</sup> , <i>R</i> <sub>wp</sub> = 2.35%, <i>R</i> <sub>p</sub> = 5.67% |                   |                     |           |            |            |           |                                              |
| Ba1                                                                                                                                                                                                                                                                                | 8 <i>f</i>        | <i>m</i> ..         | 0         | 0.34818(3) | 0.54316(4) | 1         | 1.472(16)                                    |
| Ba2                                                                                                                                                                                                                                                                                | 4 <i>c</i>        | <i>m</i> 2 <i>m</i> | 0.5       | 0.40260(5) | 0.25       | 1         | 1.090(17)                                    |
| Re                                                                                                                                                                                                                                                                                 | 4 <i>c</i>        | <i>m</i> 2 <i>m</i> | 0         | 0.23867(3) | 0.25       | 1         | 0.993(14)                                    |
| O1                                                                                                                                                                                                                                                                                 | 16 <i>h</i>       | 1                   | 0.2222(7) | 0.2779(3)  | 0.3629(3)  | 1         | 1.48(8)                                      |
| O2                                                                                                                                                                                                                                                                                 | 4 <i>c</i>        | <i>m</i> 2 <i>m</i> | 0         | 0.1161(7)  | 0.25       | 1         | 3.6(3)                                       |
| Cl1                                                                                                                                                                                                                                                                                | 4 <i>c</i>        | <i>m</i> 2 <i>m</i> | 0         | 0.4939(2)  | 0.25       | 1         | 2.66(7)                                      |
| Cl2                                                                                                                                                                                                                                                                                | 4 <i>b</i>        | 2/ <i>m</i> ..      | 0.5       | 0.5        | 0.5        | 1         | 4.28(10)                                     |
| Sr <sub>3</sub> ReO <sub>5</sub> Cl <sub>2</sub> , space group <i>Cmcm</i> (No. 63), <i>a</i> = 5.6492(3) Å, <i>b</i> = 13.1886(6) Å, <i>c</i> = 11.1144(5) Å, <i>Z</i> = 4, <i>V</i> = 828.09(7) Å <sup>3</sup> , <i>R</i> <sub>wp</sub> = 2.48%, <i>R</i> <sub>p</sub> = 5.59%   |                   |                     |           |            |            |           |                                              |
| Sr1                                                                                                                                                                                                                                                                                | 8 <i>f</i>        | <i>m</i> ..         | 0         | 0.34264(5) | 0.53964(6) | 1         | 1.569(19)                                    |
| Sr2                                                                                                                                                                                                                                                                                | 4 <i>c</i>        | <i>m</i> 2 <i>m</i> | 0.5       | 0.40018(7) | 0.25       | 1         | 1.03(2)                                      |
| Re                                                                                                                                                                                                                                                                                 | 4 <i>c</i>        | <i>m</i> 2 <i>m</i> | 0         | 0.23691(3) | 0.25       | 1         | 0.908(15)                                    |
| O1                                                                                                                                                                                                                                                                                 | 16 <i>h</i>       | 1                   | 0.2281(6) | 0.2797(3)  | 0.3655(3)  | 1         | 1.39(7)                                      |
| O2                                                                                                                                                                                                                                                                                 | 4 <i>c</i>        | <i>m</i> 2 <i>m</i> | 0         | 0.1073(6)  | 0.25       | 1         | 3.0(2)                                       |
| Cl1                                                                                                                                                                                                                                                                                | 8 <i>f</i>        | <i>m</i> ..         | 0         | 0.4984(3)  | 0.2880(3)  | 0.5       | 2.39(9)                                      |
| Cl2                                                                                                                                                                                                                                                                                | 8 <i>e</i>        | 2..                 | 0.5940(8) | 0.5        | 0.5        | 0.5       | 2.79(9)                                      |

Table S3. Anisotropic displacement parameters  $U_{ij}$  ( $\text{\AA}^2$ ) for  $\text{Ba}_3\text{ReO}_5\text{Cl}_2$  and  $\text{Sr}_3\text{ReO}_5\text{Cl}_2$ .

|                                                        | $U_{11}$   | $U_{22}$   | $U_{33}$   | $U_{23}$     | $U_{13}$    | $U_{12}$    |
|--------------------------------------------------------|------------|------------|------------|--------------|-------------|-------------|
| <b><math>\text{Ba}_3\text{ReO}_5\text{Cl}_2</math></b> |            |            |            |              |             |             |
| Re1                                                    | 0.0096(2)  | 0.0101(2)  | 0.0100(2)  | 0            | 0           | 0           |
| Ba1                                                    | 0.0185(3)  | 0.0125(2)  | 0.0131(3)  | -0.00006(16) | 0           | 0           |
| Ba2                                                    | 0.0103(3)  | 0.0122(3)  | 0.0103(3)  | 0            | 0           | 0           |
| Cl1                                                    | 0.0154(13) | 0.0178(14) | 0.0464(19) | 0            | 0           | 0           |
| Cl2                                                    | 0.077(3)   | 0.038(2)   | 0.0139(15) | -0.0100(13)  | 0           | 0           |
| O1                                                     | 0.0107(19) | 0.022(2)   | 0.0113(17) | 0.0021(15)   | 0.0014(15)  | -0.0007(16) |
| O2                                                     | 0.053(7)   | 0.009(4)   | 0.045(6)   | 0            | 0           | 0           |
| <b><math>\text{Sr}_3\text{ReO}_5\text{Cl}_2</math></b> |            |            |            |              |             |             |
| Re1                                                    | 0.0046(2)  | 0.0099(2)  | 0.0128(2)  | 0            | 0           | 0           |
| Sr1                                                    | 0.0139(4)  | 0.0154(4)  | 0.0178(4)  | 0.0037(3)    | 0           | 0           |
| Sr2                                                    | 0.0070(4)  | 0.0110(4)  | 0.0130(5)  | 0            | 0           | 0           |
| Cl1                                                    | 0.0138(16) | 0.0179(16) | 0.040(3)   | -0.0099(16)  | 0           | 0           |
| Cl2                                                    | 0.036(2)   | 0.027(2)   | 0.0206(18) | -0.0055(16)  | 0           | 0           |
| O1                                                     | 0.0071(17) | 0.0207(18) | 0.0138(17) | 0.0025(15)   | -0.0009(15) | -0.0008(14) |
| O2                                                     | 0.027(5)   | 0.005(3)   | 0.057(6)   | 0            | 0           | 0           |

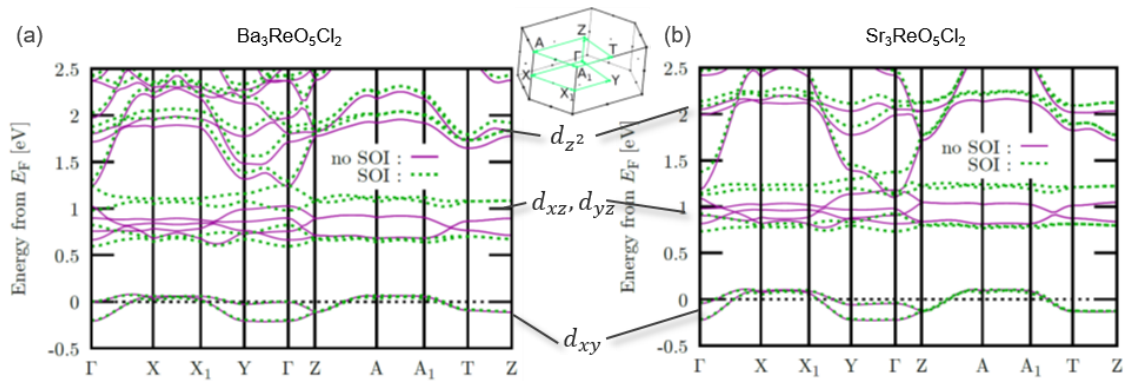

Figure S2. Band structures of (a) BROC and (b) SROC. The Brillouin zone and  $k$ -path and the orbital characters of the bands are shown between them. The magenta solid and green dashed lines represent the energy bands calculated with and without SOIs, respectively. The occupied  $d_{xy}$  orbitals, which are responsible for the magnetism, are not influenced by SOIs, while the degenerated  $d_{zx}$  and  $d_{yz}$  bands are strongly affected.
